# Supplementary material for: A carbon fiber based three-phase heterostructure composite CF/Co0.2Fe2.8O4/PANI as an efficient electromagnetic wave absorber in the Ku band
Source: Royal Society of Chemistry journal article supplement (doi:10.1039/c5ra07192e), 2015-01-01
Supplement: c5ra07192e1.pdf [file c5ra07192e1.pdf]

## Supporting Information

**A carbon fiber based three-phase heterostructure composite CF/Co<sub>0.2</sub>Fe<sub>2.8</sub>O<sub>4</sub>/PANI as an efficient electromagnetic wave absorber in  $K_u$  band**

Jiyong Fang, Zheng Chen, Wei Wei, Yunxi Li, Tao Liu, Zhi Liu, Xigui Yue\*, and Zhenhua Jiang

Alan G. MacDiarmid Institute, College of Chemistry, Jilin University, Changchun 130012, P.R. of China

*Corresponding author: Xigui Yue*

*E-mail addresses: yuexigui@jlu.edu.cn*

*Tel/Fax: +86 431 85168868*

*Alan G. MacDiarmid Institute, College of Chemistry, Jilin University, 2699 Qianjin street, Changchun 130012, People's Republic of China*

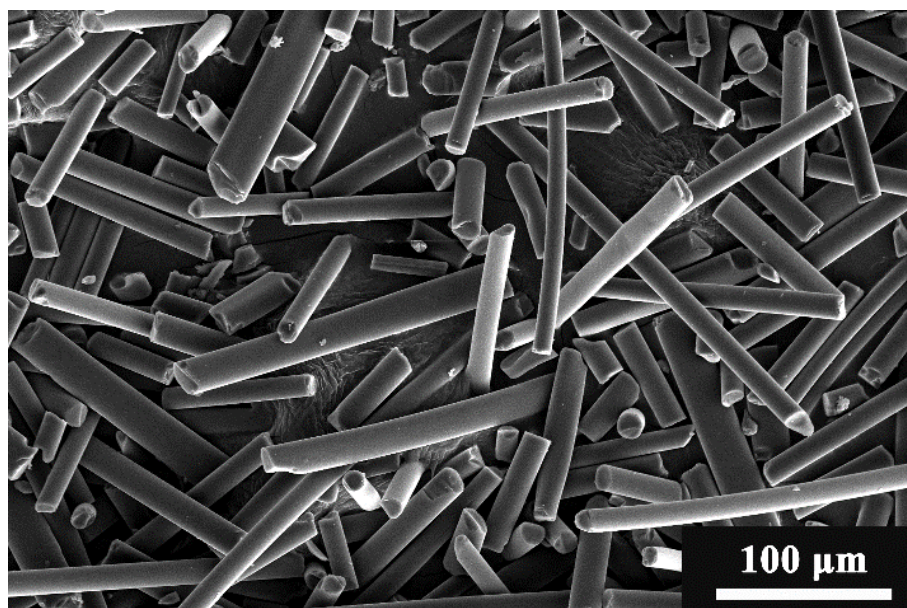

Fig. S1. The SEM image of the received chopped CF with average diameter 14.5 μm, average length 0.15 mm.

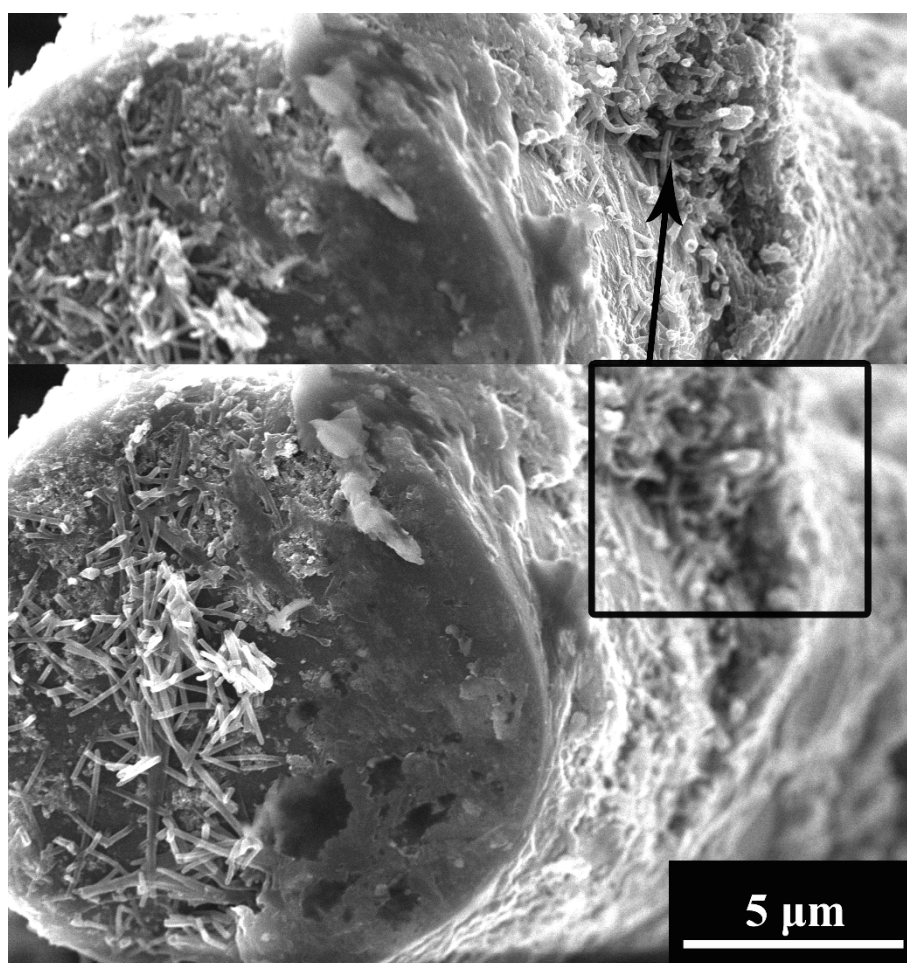

Fig. S2. SEM images of the cross section view for CF/Co<sub>0.2</sub>Fe<sub>2.8</sub>O<sub>4</sub>/PANI.

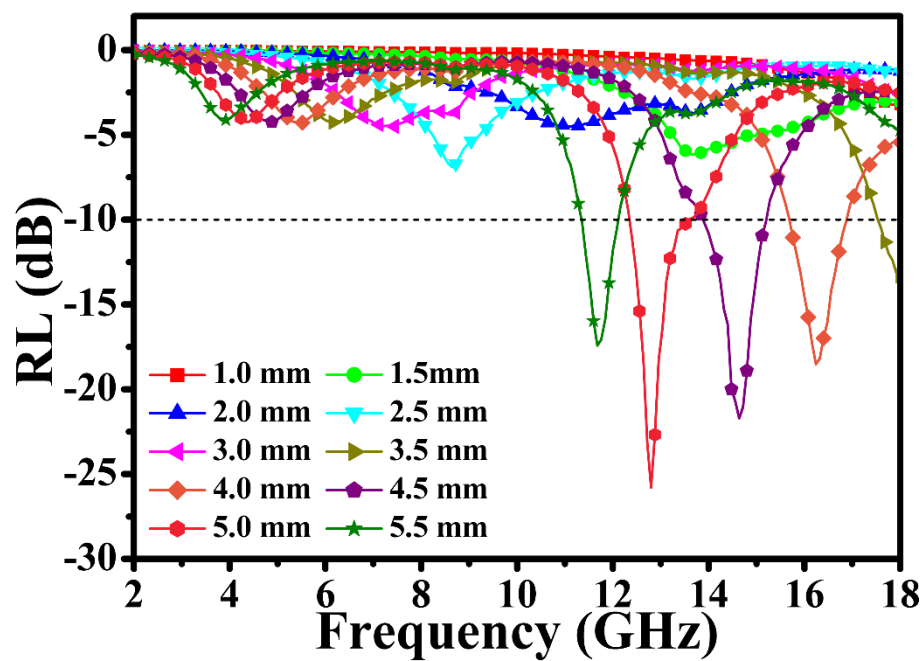

Fig. S3. The relationship between RL and the EM wave frequency for CF/Co<sub>0.2</sub>Fe<sub>2.8</sub>O<sub>4</sub> in 2-18 GHz range with the thickness from 1.0 to 5.5 mm.

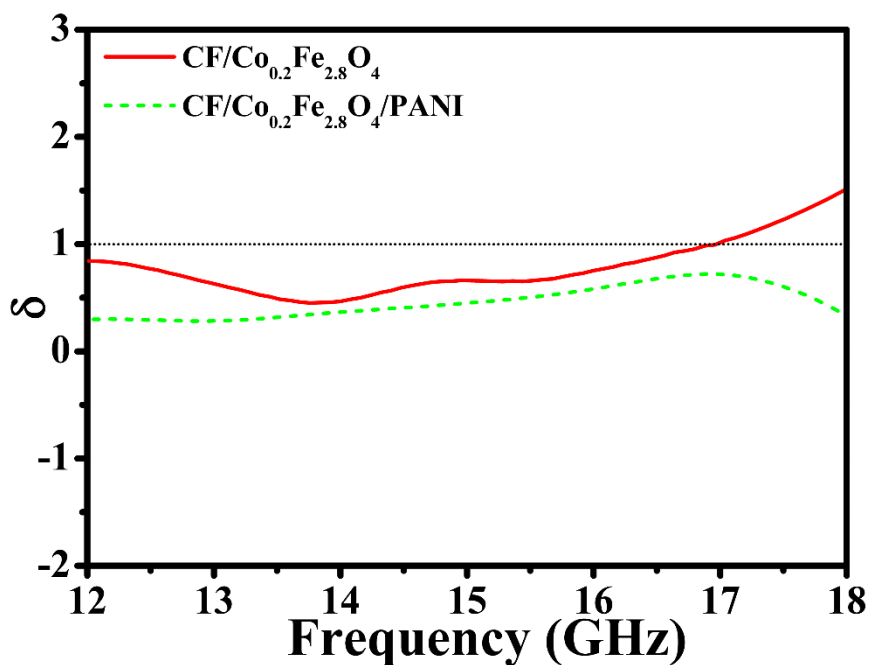

Fig. S4. Coefficient matching factor  $\delta$  for CF/Co<sub>0.2</sub>Fe<sub>2.8</sub>O<sub>4</sub> and CF/Co<sub>0.2</sub>Fe<sub>2.8</sub>O<sub>4</sub>/PANI in EM wave  $K_u$  band 12-18 GHz.

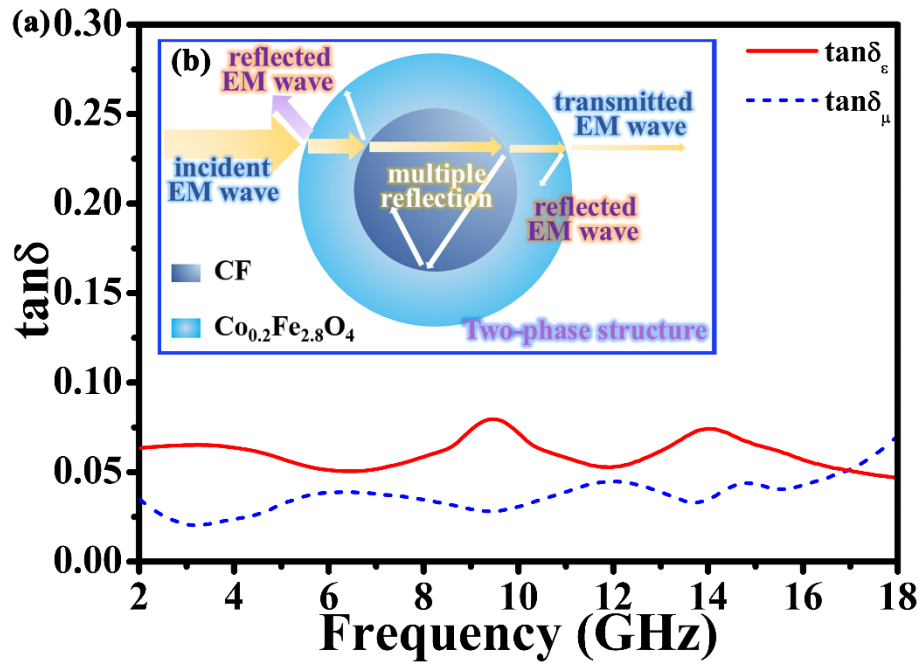

Fig. S5. (a) Frequency dependence of the loss tangent for CF/Co<sub>0.2</sub>Fe<sub>2.8</sub>O<sub>4</sub> in 2-18 GHz; (b) EM wave spread schemes of CF/Co<sub>0.2</sub>Fe<sub>2.8</sub>O<sub>4</sub>.
